# Supplementary material
Source: PubMed Central journal article supplement (PMC3161306)

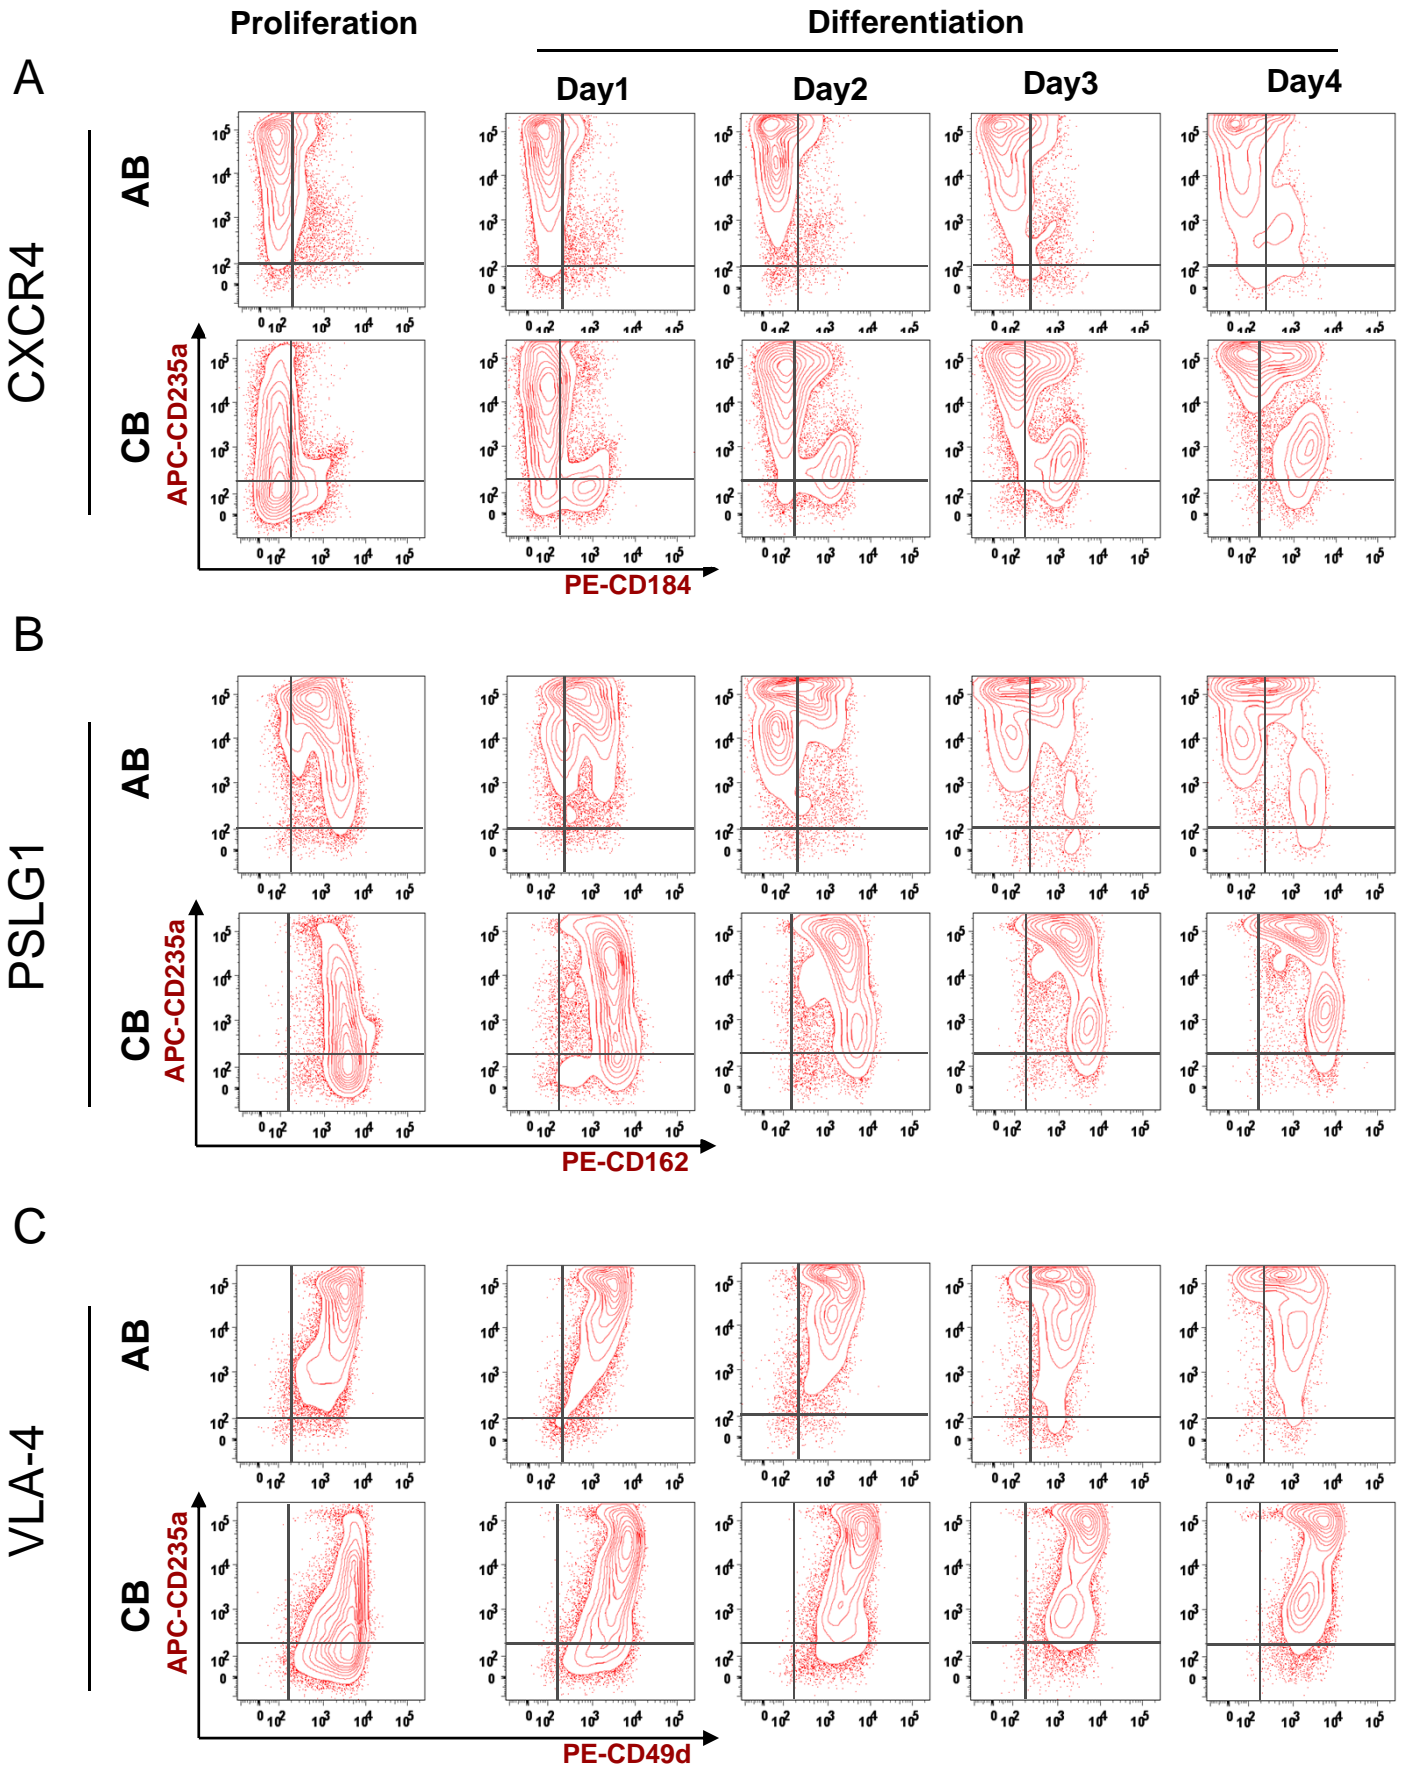

Supplemental Figure 4

Supplement: 673752.f4.pdf [file 673752.f4.pdf]
